# Supplementary material for: Ecological diversification preceded geographical expansion during the evolutionary radiation of Cataglyphis desert ants
Source: PubMed Central journal article supplement — iScience. 2024 Apr 30;27(6):109852. doi: 10.1016/j.isci.2024.109852 (PMC11109030; doi:10.1016/j.isci.2024.109852), 2024-04-30
Supplement: mmc1.pdf [file mmc1.pdf]

iScience, Volume 27

## **Supplemental information**

### **Ecological diversification preceded geographical expansion during the evolutionary radiation of *Cataglyphis* desert ants**

**Nathan Lecoq de Pletincx, Xim Cerdà, Kadri Kiran, Celal Karaman, Ahmed Taheri, and Serge Aron**

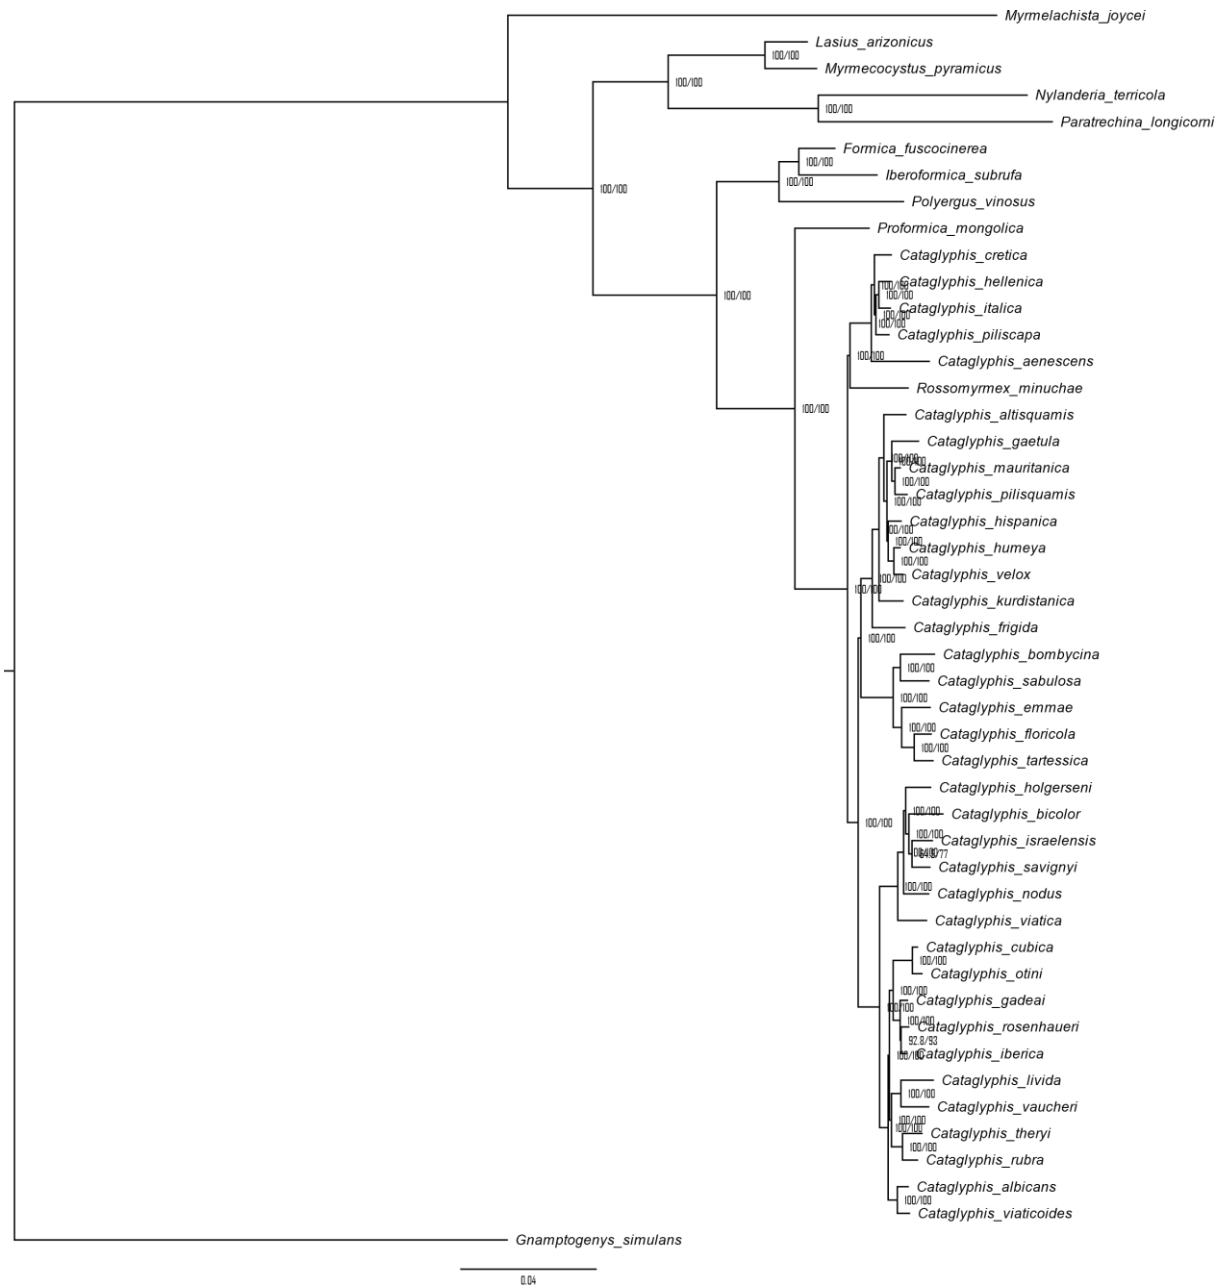

**Supplementary Fig. 1. Phylogenetic tree inferred using IQ-TREE, the 75% taxon-filtered locus set, and no partitioning, related to STAR Methods.**  
Support values are SH-aLRT/UFB.

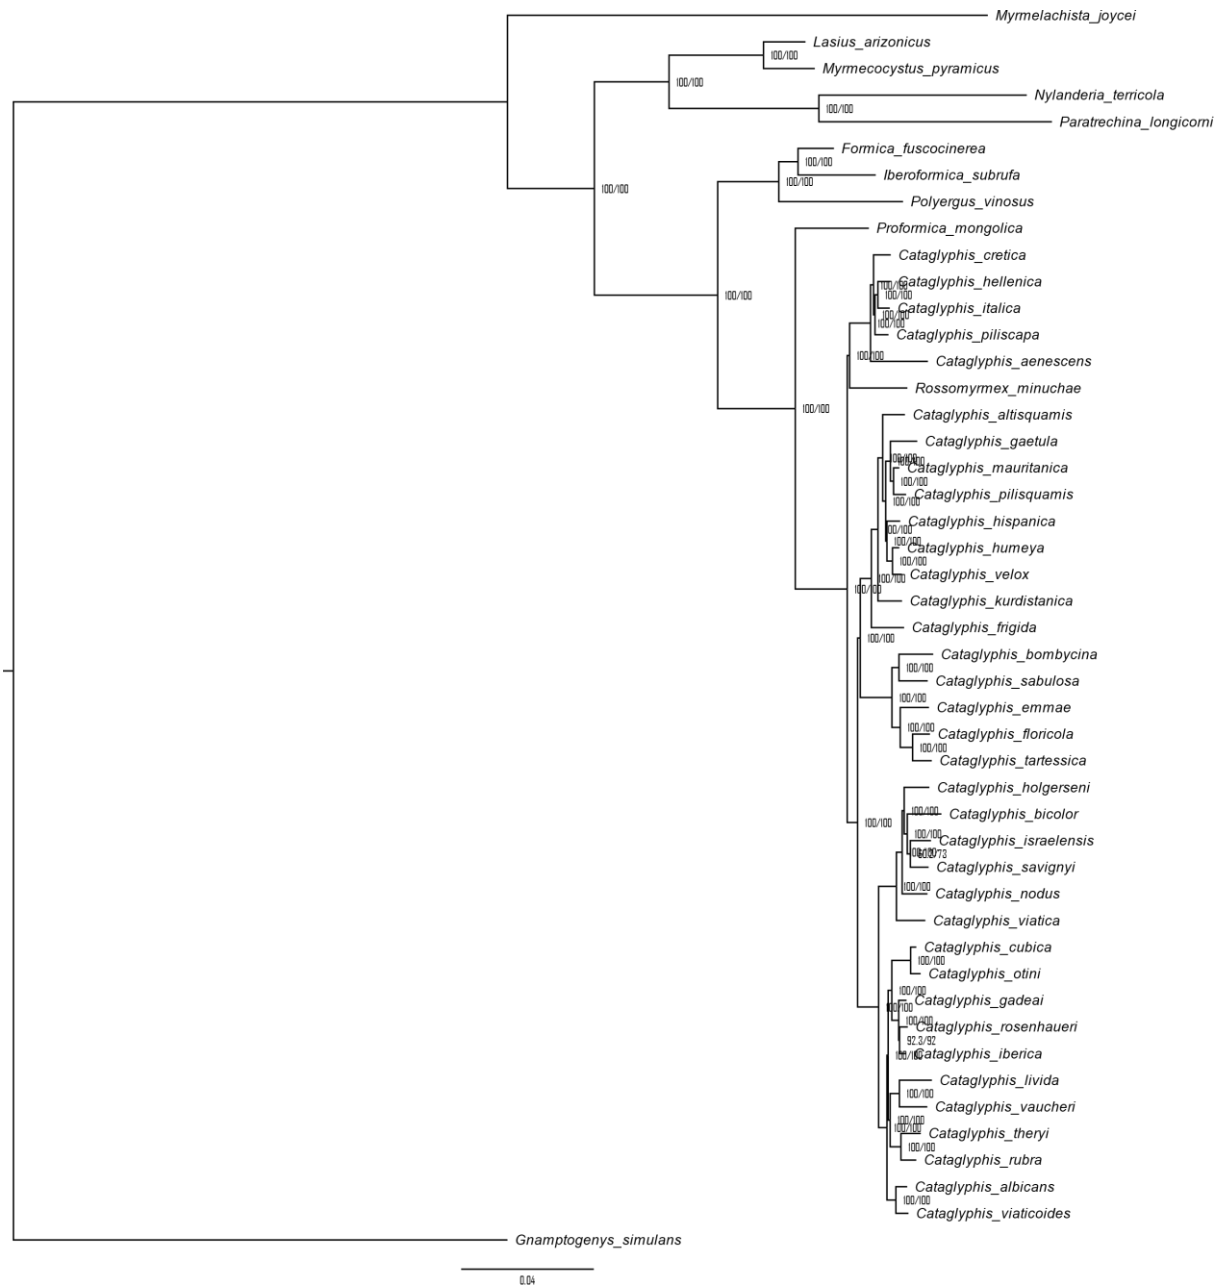

**Supplementary Fig. 2. Phylogenetic tree inferred using IQ-TREE, the 75% taxon-filtered locus set, and a by locus partitioning scheme, related to STAR Methods.**  
Support values are SH-aLRT/UFB.

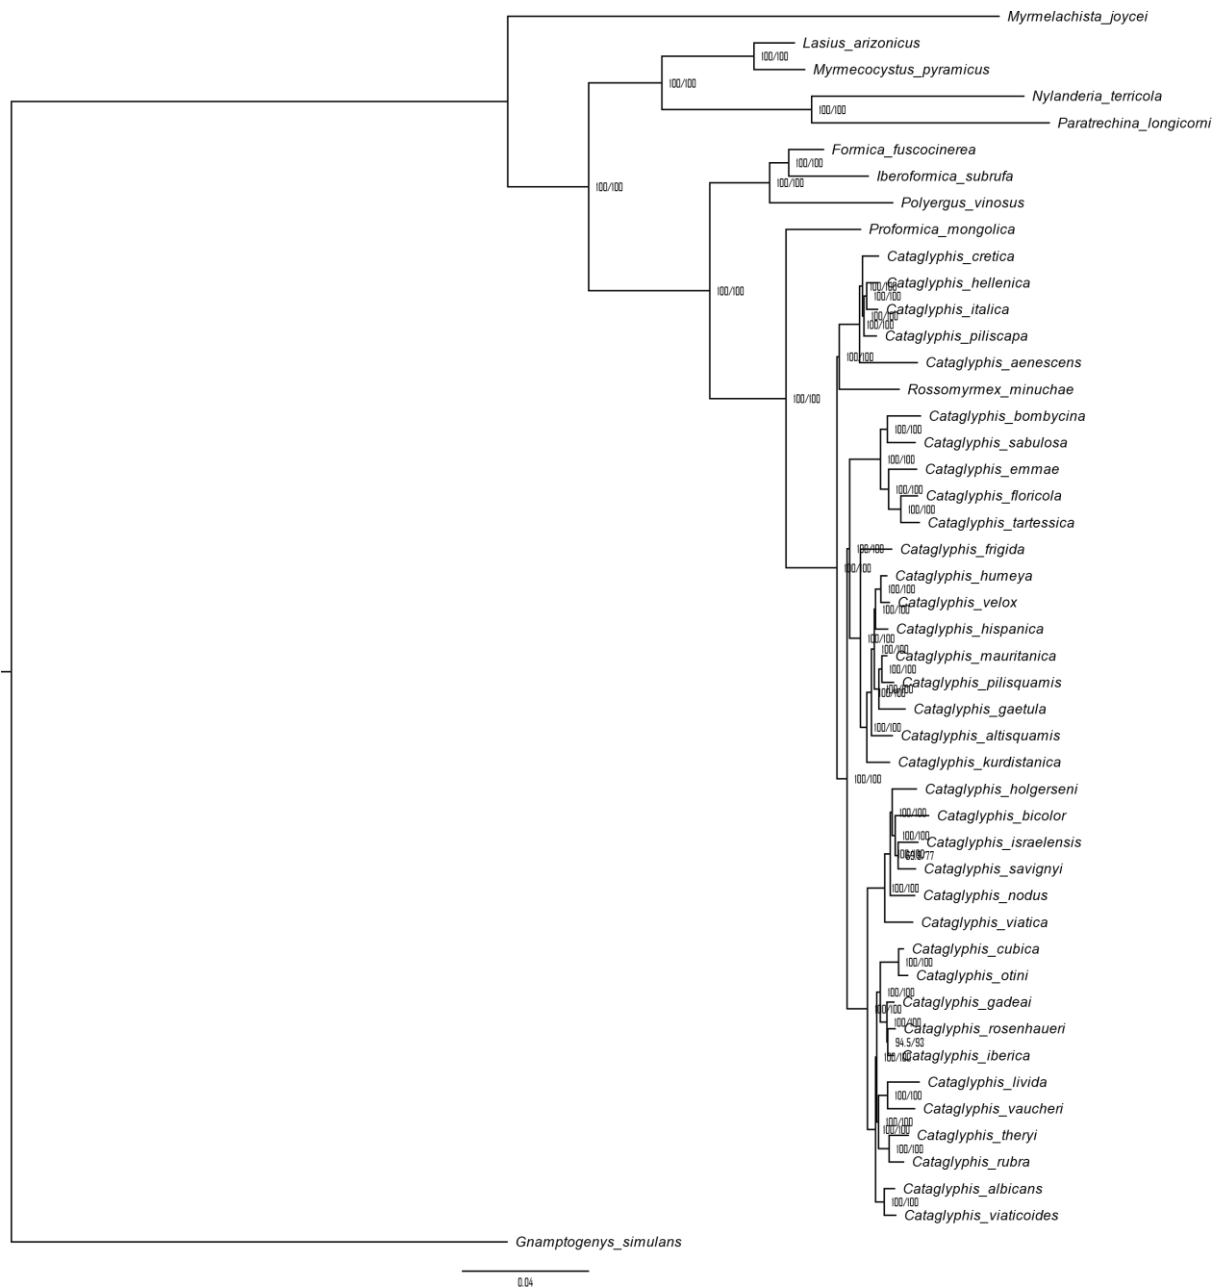

**Supplementary Fig. 3. Phylogenetic tree inferred using IQ-TREE, the 75% taxon-filtered locus set, and the SWSC-EN partitioning scheme, related to STAR Methods.**  
Support values are SH-aLRT/UFB.

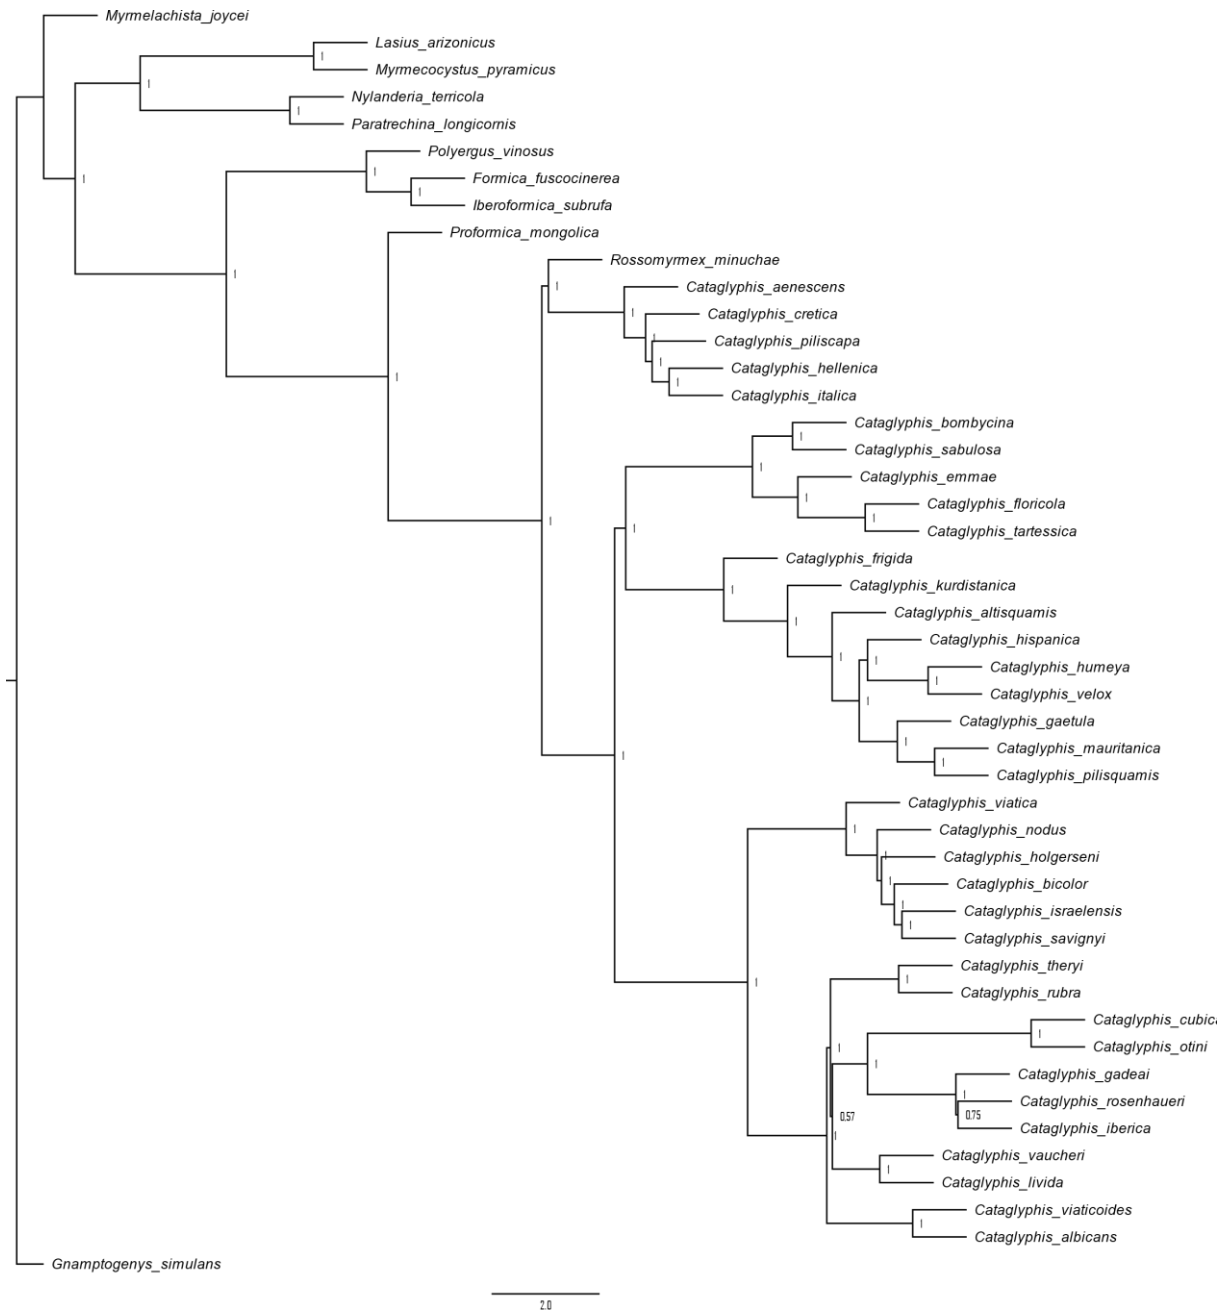

**Supplementary Fig. 4. Species tree inferred using ASTRAL and the 75% taxon-filtered locus set, related to STAR Methods.**

Support values are local posterior probabilities.



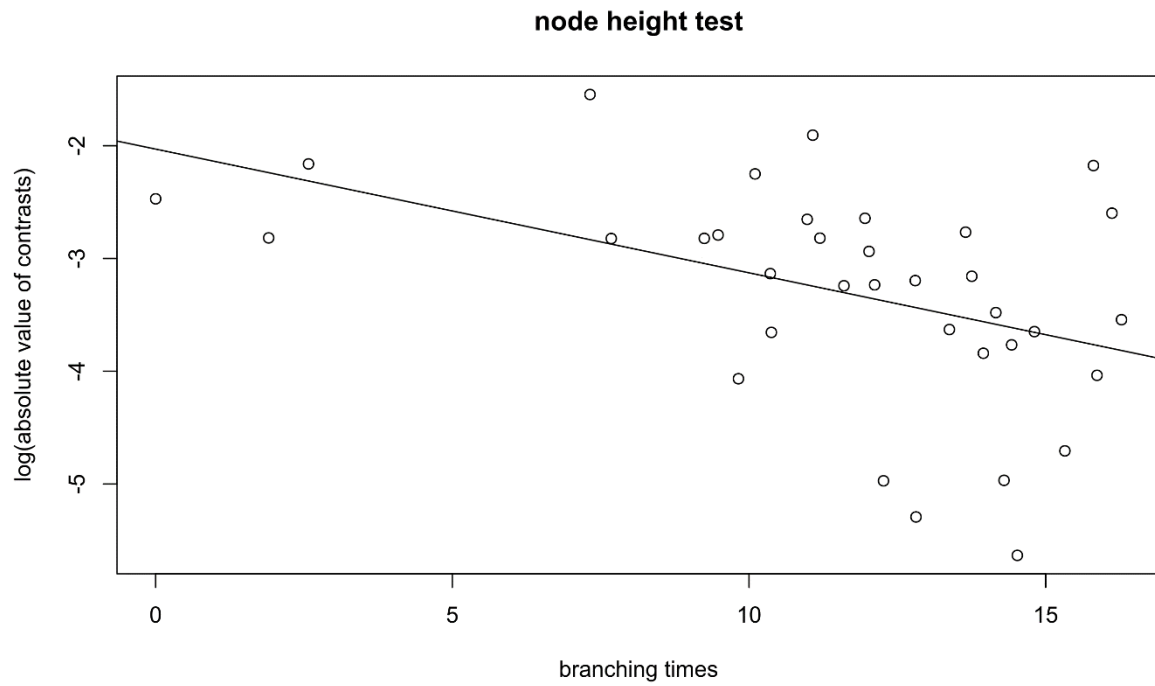

**Supplementary Fig. 6. Node height test for mean worker head width in *Cataglyphis* ants, related to Figure 2b.**

The evolution of worker head width significantly slowed with time ( $df = 33$ ,  $t = -3.053$ ,  $p = 0.004$ ).

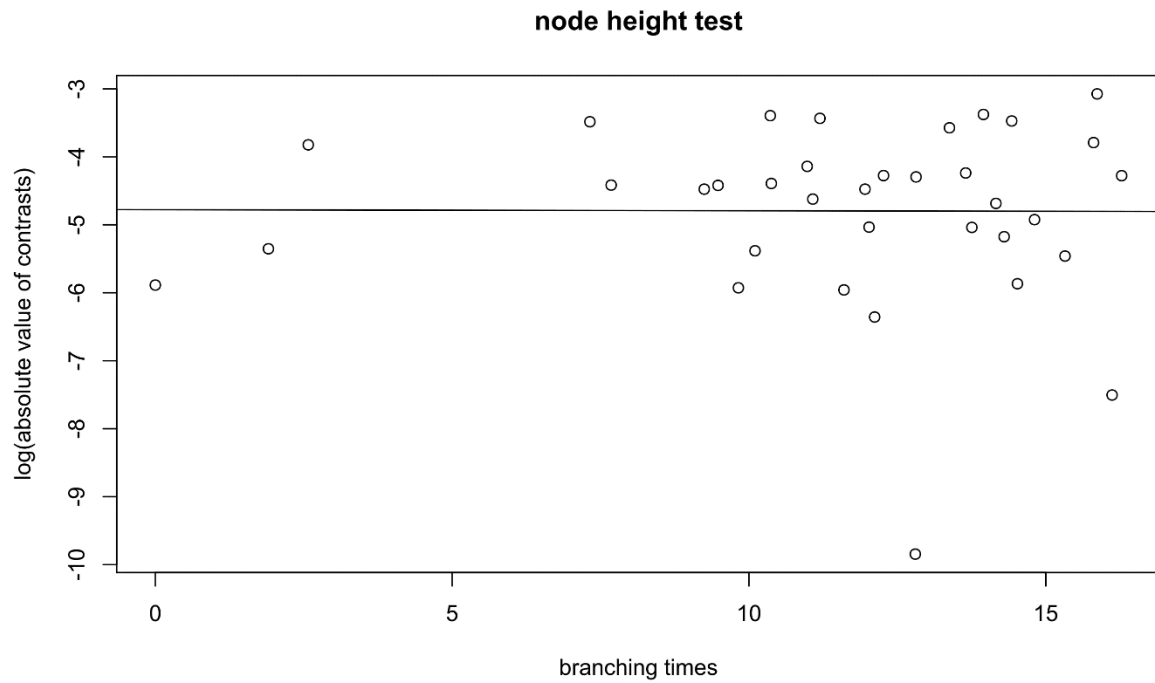

**Supplementary Fig. 7. Node height test for variation in worker head width in *Cataglyphis* ants, related to STAR Methods.**  
Evolutionary rate of variation in worker head width remained stable through time (df = 33,  $t = -0.026$ ,  $p = 0.98$ ).



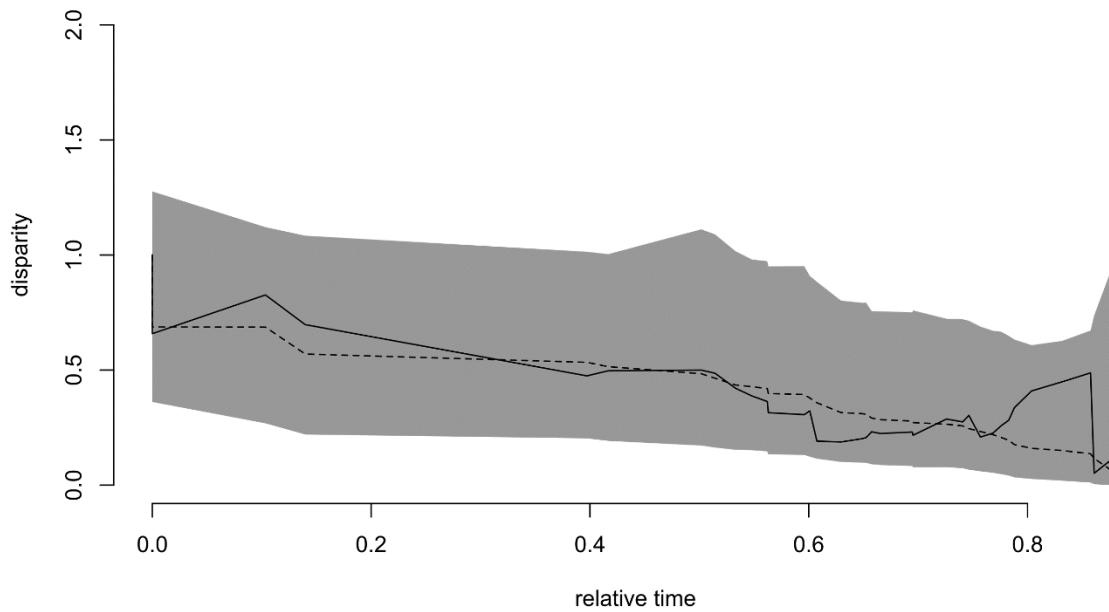

**Supplementary Fig. 8. Evolution of disparity in worker head with variation in *Cataglyphis* ants, related to STAR Methods.**

The dashed line and the grey area represent, respectively, the evolution of worker head with variation disparity and the 95% confidence interval for evolution under the Brownian Motion model (null model). The black line represents disparity in worker size variation observed in *Cataglyphis*, which does not differ from expectations under the null model (Rank envelope test;  $p = 0.6431$ ;  $p$ -interval = 0.6428 – 0.6436).
